# Supplementary material
Source: publisher figshare collection journal article supplement (https://plos.figshare.com/articles/dataset/_/1627519)
Supplement: Supplementary file [file 1]

| DMSO | rh-AR + DMSO | rh-AR + TRAM-34 |
|------|--------------|-----------------|
| 1.01 | 22.26        | 13.71           |
| 1.09 | 3.3          | 3.51            |
| 1.33 | 2.43         | 2.23            |
| 0.58 | 3.89         | 2.76            |
| 0.45 | 17.31        | 25.16           |
| 0.48 | 39.58        | 37.36           |
