# Supplementary material
Source: publisher figshare collection journal article supplement (https://plos.figshare.com/articles/dataset/_/1627519)
Supplement: Supplementary file [file 1]

|    | Control |     | DMSO |     | TRAM-34 |     |
|----|---------|-----|------|-----|---------|-----|
| 0  | 10.3    | 0.8 |      |     |         |     |
| 30 |         |     | 11.7 | 1.2 | 10.3    | 1.1 |
| 60 |         |     | 11.7 | 0.8 | 11.4    | 0.8 |
