# Supplementary material
Source: publisher figshare collection journal article supplement (https://plos.figshare.com/articles/dataset/_/1627519)

## Original uncropped blots for Figure 1C

Western blot with anti-K<sub>Ca</sub>3.1 antibody (short exposure to show protein ladder):

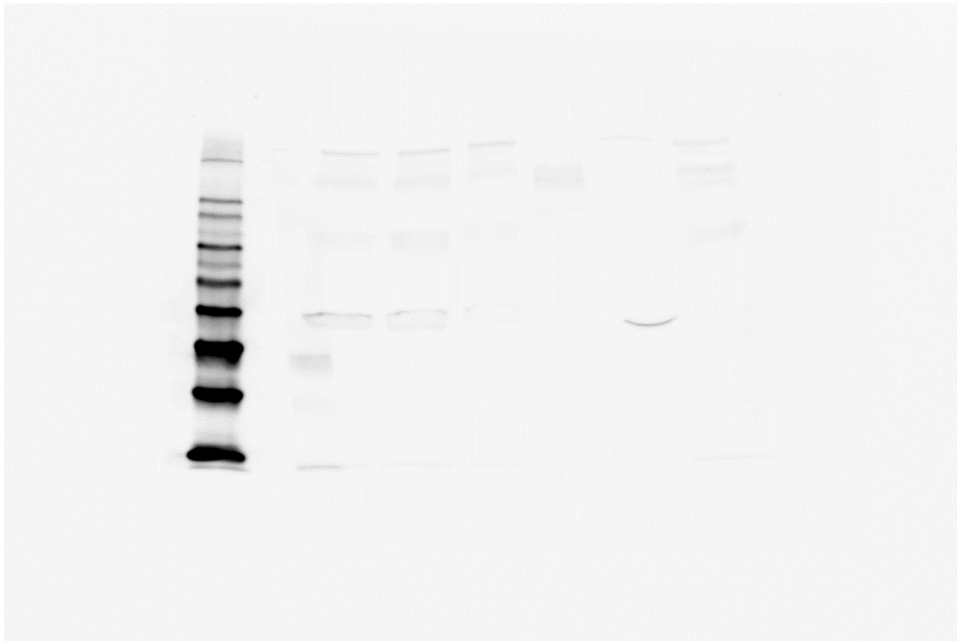

Western blot with anti-K<sub>Ca</sub>3.1 antibody (longer exposure to show target bands):

***Lanes:***

Ladder; donor A026; donor A027; donor NA001.

*Last 3 lanes = other samples, not applicable to this study.*

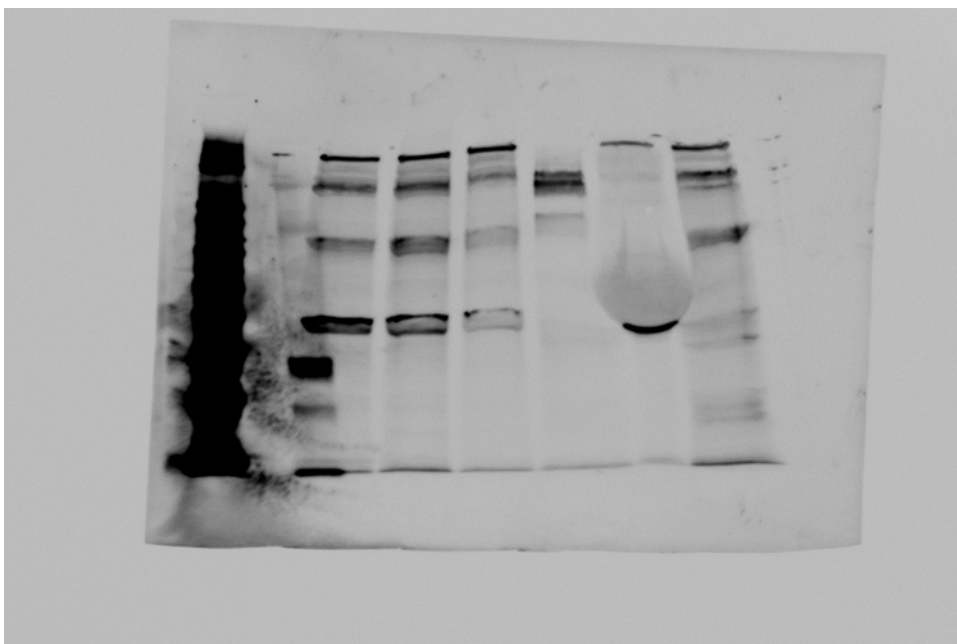

Western blot with anti- $\beta$ -actin antibody after membrane was stripped to remove anti-K<sub>Ca</sub>3.1 antibody:

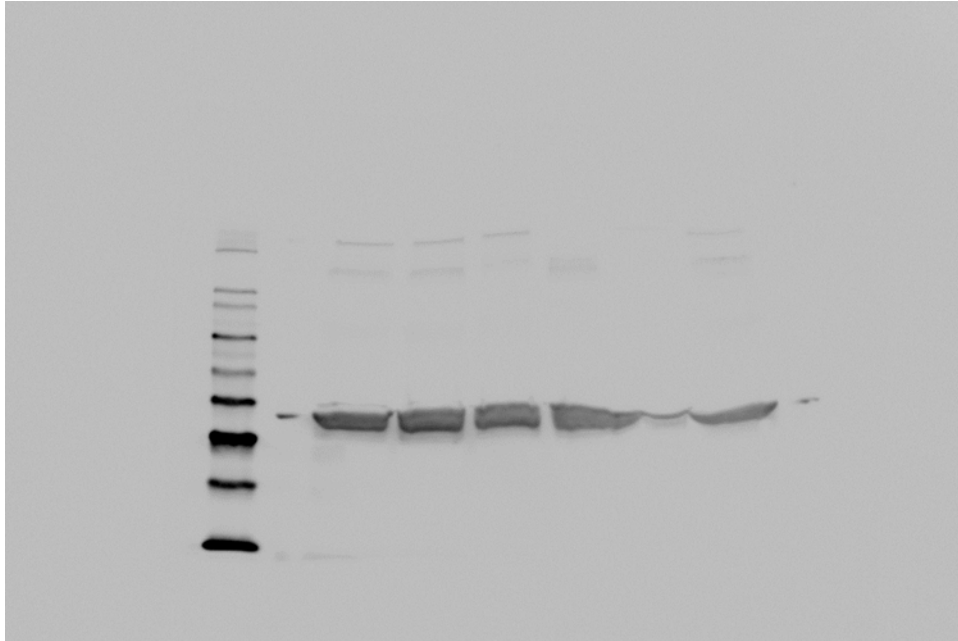

Supplement: Supplementary file [file 1]
