# Supplementary material
Source: publisher figshare collection journal article supplement (https://plos.figshare.com/articles/dataset/_/1627519)
Supplement: Supplementary file [file 1]

| Severe asthmatics | Moderate asthmatics | Mild asthmatics | Healthy controls |
|-------------------|---------------------|-----------------|------------------|
| 9.2               | 0.71                | 7.18            | 0.94             |
| 8.86              | 2.43                | 0.62            | 1                |
| 2.36              | 2.04                | 4.71            | 5.42             |
| 8.4               | 3.69                |                 | 2.19             |
| 6.49              | 0.5                 |                 | 0.14             |
| 1.13              | 0.5                 |                 | 0.04             |
| 0.95              | 1.22                |                 | 0.67             |
| 1.98              |                     |                 | 0.17             |
| 3.31              |                     |                 |                  |
| 4.82              |                     |                 |                  |
| 5.35              |                     |                 |                  |
| 0.38              |                     |                 |                  |
