# Supplementary material
Source: publisher figshare collection journal article supplement (https://plos.figshare.com/articles/dataset/_/1627519)
Supplement: Supplementary file [file 1]

| Command potential (mV) | Baseline |       | 1-EBIO |       | TRAM-34 |       |
|------------------------|----------|-------|--------|-------|---------|-------|
| -120                   | -45.18   | 7.56  | -66.19 | 7.76  | -49.3   | 5.21  |
| -110                   | -39.11   | 6.58  | -60.42 | 7.04  | -42.94  | 4.96  |
| -100                   | -34.02   | 5.54  | -50.82 | 5.74  | -38.87  | 4.68  |
| -90                    | -29.47   | 5.14  | -40.93 | 4.92  | -33.34  | 4.32  |
| -80                    | -24.87   | 4.99  | -29.72 | 3.05  | -28.69  | 3.68  |
| -70                    | -20.05   | 4.65  | -18.56 | 2.37  | -24.37  | 3.18  |
| -60                    | -17.6    | 4.29  | -6.84  | 2.58  | -19.95  | 2.96  |
| -50                    | -13.75   | 3.77  | 6.7    | 3.96  | -17.54  | 2.44  |
| -40                    | -9.58    | 3.41  | 20.06  | 6.2   | -11.15  | 2.28  |
| -30                    | -5.21    | 3.17  | 34.8   | 8.26  | -8.66   | 2.09  |
| -20                    | -1.95    | 2.94  | 48.37  | 11.02 | -3.4    | 2.12  |
| -10                    | 1.73     | 2.51  | 62.72  | 13.16 | 0.64    | 2.19  |
| 0                      | 6.79     | 2.82  | 75.12  | 15.27 | 5.16    | 2.64  |
| 10                     | 11.6     | 2.85  | 86.36  | 18.37 | 9.81    | 2.71  |
| 20                     | 17.63    | 3.53  | 93.23  | 19.07 | 16.3    | 3.45  |
| 30                     | 22.56    | 4.14  | 101.51 | 20.28 | 22.16   | 4.08  |
| 40                     | 27.36    | 5.41  | 104.52 | 20.73 | 30.05   | 4.96  |
| 50                     | 35.87    | 7.1   | 114.34 | 22.07 | 37.67   | 7.3   |
| 60                     | 45.97    | 9.14  | 125.55 | 22.93 | 52.8    | 10.13 |
| 70                     | 57.81    | 11.35 | 141.21 | 25.41 | 73.13   | 15.47 |
| 80                     | 72.21    | 14.82 | 170.08 | 32.14 | 97.91   | 24.15 |
| 90                     | 91.46    | 18.07 | 210.98 | 45.23 | 135.58  | 32.92 |
| 100                    | 118.6    | 22.96 | 274.52 | 56.95 | 212.07  | 61.18 |
