# Supplementary material
Source: publisher figshare collection journal article supplement (https://plos.figshare.com/articles/dataset/_/1627519)
Supplement: Supplementary file [file 1]

| Asthmatics | Healthy controls |
|------------|------------------|
| 9.2        | 0.94             |
| 8.86       | 1                |
| 2.36       | 5.42             |
| 8.4        | 2.19             |
| 6.49       | 0.14             |
| 1.13       | 0.04             |
| 0.95       | 0.67             |
| 1.98       | 0.17             |
| 3.31       |                  |
| 4.82       |                  |
| 5.35       |                  |
| 0.38       |                  |
| 0.71       |                  |
| 2.43       |                  |
| 2.04       |                  |
| 3.69       |                  |
| 0.5        |                  |
| 0.5        |                  |
| 7.18       |                  |
| 0.62       |                  |
| 4.71       |                  |
| 1.22       |                  |
