# Supplementary material
Source: publisher figshare collection journal article supplement (https://plos.figshare.com/articles/dataset/_/1627519)
Supplement: Supplementary file [file 1]

| Asthmatics | Healthy controls |
|------------|------------------|
| 3.06       | 0.55             |
| 1.08       | 0.64             |
| 1.64       | 1.22             |
| 0.68       | 1.98             |
| 0.96       | 1.64             |
| 1.55       |                  |
| 1.47       |                  |
| 1.9        |                  |
| 0.74       |                  |
| 0.48       |                  |
