# Supplementary material
Source: publisher figshare collection journal article supplement (https://plos.figshare.com/articles/dataset/_/1627519)
Supplement: Supplementary file [file 1]

|    | Control  |          | DMSO     |           | TRAM-34  |           |
|----|----------|----------|----------|-----------|----------|-----------|
| 0  | 12.70185 | 0.809943 |          |           |          |           |
| 30 |          |          | 11.84444 | 0.7414374 | 11.74815 | 1.006813  |
| 60 |          |          | 11.75556 | 0.9275503 | 12.4963  | 0.8511029 |
