# Supplementary material
Source: publisher figshare collection journal article supplement (https://plos.figshare.com/articles/dataset/_/1627519)
Supplement: Supplementary file [file 1]

| Command potential (mV) | Baseline |       | 1-EBIO  |        | TRAM-34 |       |
|------------------------|----------|-------|---------|--------|---------|-------|
| -120                   | -43.27   | 7.62  | -125.23 | 36.73  | -99.27  | 41.32 |
| -110                   | -38.29   | 7.09  | -112.28 | 31.01  | -89.55  | 37.17 |
| -100                   | -33.65   | 6.09  | -93.04  | 25.28  | -77.71  | 33.03 |
| -90                    | -27.9    | 5.26  | -74.37  | 19.61  | -68.48  | 29.49 |
| -80                    | -23.05   | 4.38  | -56.02  | 14.7   | -59.19  | 25.27 |
| -70                    | -19.34   | 4.09  | -35.46  | 11.17  | -51.1   | 21.71 |
| -60                    | -14.69   | 3.25  | -12.99  | 11.42  | -41.56  | 17.42 |
| -50                    | -10.58   | 2.99  | 13.36   | 15.04  | -32.5   | 13.01 |
| -40                    | -6.68    | 3.12  | 40.27   | 20.46  | -24.08  | 9.51  |
| -30                    | -1.97    | 3.41  | 69.34   | 27.43  | -15.22  | 5.92  |
| -20                    | 2.93     | 4.57  | 104.19  | 34.41  | -6.69   | 3.46  |
| -10                    | 7.73     | 5.29  | 139.95  | 42.02  | 2.61    | 4.45  |
| 0                      | 13.69    | 7.65  | 176.67  | 49.43  | 11.82   | 7.51  |
| 10                     | 20.03    | 8.93  | 218.66  | 57.72  | 22.04   | 11.04 |
| 20                     | 24.13    | 9.23  | 259.14  | 65.95  | 31.05   | 14.34 |
| 30                     | 33.27    | 11.99 | 313.29  | 83.72  | 40.87   | 17.54 |
| 40                     | 39.66    | 11.59 | 357.53  | 93.4   | 52.34   | 19.89 |
| 50                     | 48.73    | 12.51 | 394.22  | 98.51  | 64.09   | 21.64 |
| 60                     | 63.96    | 15.61 | 418.97  | 95.61  | 81.16   | 24.53 |
| 70                     | 75.77    | 14.85 | 469.97  | 100.85 | 104.84  | 27.74 |
| 80                     | 101.72   | 19.08 | 523.23  | 105.11 | 141     | 32.49 |
| 90                     | 137.99   | 23.39 | 585.11  | 110.7  | 185.93  | 39.37 |
| 100                    | 197.49   | 31.43 | 684.68  | 124.09 | 257.68  | 46.44 |
