# Supplementary material
Source: publisher figshare collection journal article supplement (https://plos.figshare.com/articles/dataset/_/1627519)
Supplement: Supplementary file [file 1]

| Command potential (mV) | Baseline |       | 1-EBIO  |        | TRAM-34 |       |
|------------------------|----------|-------|---------|--------|---------|-------|
| -120                   | -20.14   | 2.63  | -194.97 | 49.15  | -72.81  | 34.36 |
| -110                   | -17.49   | 3.11  | -163.46 | 42.85  | -66.63  | 32.66 |
| -100                   | -15.3    | 3.4   | -120.55 | 34.24  | -53.68  | 22.47 |
| -90                    | -13.03   | 2.47  | -72.39  | 26.2   | -44.27  | 19.94 |
| -80                    | -10.23   | 1.88  | -24.87  | 21.88  | -32.75  | 12.4  |
| -70                    | -9.79    | 2.48  | 28.68   | 19.93  | -27.51  | 10.81 |
| -60                    | -7.56    | 2.13  | 85.92   | 23.36  | -21.61  | 7.47  |
| -50                    | -3.72    | 1.84  | 144.44  | 29.72  | -13.83  | 7.07  |
| -40                    | -2.83    | 2.1   | 212.67  | 38.04  | -9.31   | 5.57  |
| -30                    | -1.03    | 2.16  | 279.02  | 50.62  | -2.98   | 1.98  |
| -20                    | 3.07     | 1.7   | 347.92  | 59.43  | 4.14    | 1.78  |
| -10                    | 4        | 2.4   | 422.88  | 69.85  | 12.87   | 4.34  |
| 0                      | 5.4      | 1.91  | 484.08  | 83.12  | 17.35   | 6.34  |
| 10                     | 8.08     | 2     | 560.83  | 93.92  | 26.57   | 9.67  |
| 20                     | 10.49    | 1.92  | 635.03  | 105.34 | 33.15   | 12.08 |
| 30                     | 13.62    | 2.94  | 710.5   | 119.75 | 39.88   | 14.56 |
| 40                     | 17.14    | 2.88  | 765.3   | 131.03 | 47.39   | 15.29 |
| 50                     | 22.92    | 2.97  | 847.91  | 136.15 | 55.71   | 15.94 |
| 60                     | 24.87    | 4.86  | 911.29  | 140.86 | 59.26   | 20.14 |
| 70                     | 34.41    | 7.56  | 945.16  | 153.85 | 67.77   | 20.62 |
| 80                     | 41.08    | 7.46  | 998.38  | 157    | 73.98   | 19.62 |
| 90                     | 49       | 11.53 | 1005.89 | 178.77 | 79.78   | 20.4  |
| 100                    | 67.29    | 20    | 928.57  | 211.01 | 98.82   | 20.6  |
