# Supplementary material
Source: publisher figshare collection journal article supplement (https://plos.figshare.com/articles/dataset/_/1627519)
Supplement: Supplementary file [file 1]

| DMSO  | rh-AR + DMSO | rh-AR + TRAM-34 |
|-------|--------------|-----------------|
| 0.988 | 1.244        | 1.104           |
| 0.688 | 0.943        | 0.875           |
| 0.716 | 0.875        | 0.951           |
| 0.628 | 0.854        | 0.877           |
| 0.67  | 0.966        | 0.932           |
| 0.692 | 0.907        | 0.91            |
