# Supplementary material
Source: publisher figshare collection journal article supplement (https://plos.figshare.com/articles/dataset/_/1627519)
Supplement: Supplementary file [file 1]

| Asthmatics | Healthy controls |
|------------|------------------|
|------------|------------------|

|     |      |
|-----|------|
| 3.7 | 0.34 |
|-----|------|

|      |      |
|------|------|
| 4.97 | 1.35 |
|------|------|

|      |      |
|------|------|
| 6.12 | 2.54 |
|------|------|

|       |      |
|-------|------|
| 12.12 | 0.43 |
|-------|------|

|      |      |
|------|------|
| 2.66 | 0.49 |
|------|------|

|      |      |
|------|------|
| 2.44 | 0.06 |
|------|------|

|      |      |
|------|------|
| 3.39 | 0.34 |
|------|------|

|      |      |
|------|------|
| 2.79 | 0.48 |
|------|------|

|      |  |
|------|--|
| 4.01 |  |
|------|--|

|     |  |
|-----|--|
| 1.6 |  |
|-----|--|

|      |  |
|------|--|
| 2.55 |  |
|------|--|

|      |  |
|------|--|
| 0.46 |  |
|------|--|

|      |  |
|------|--|
| 0.46 |  |
|------|--|

|      |  |
|------|--|
| 2.26 |  |
|------|--|

|      |  |
|------|--|
| 1.19 |  |
|------|--|

|      |  |
|------|--|
| 3.64 |  |
|------|--|

|      |  |
|------|--|
| 0.68 |  |
|------|--|

|      |  |
|------|--|
| 1.83 |  |
|------|--|

|      |  |
|------|--|
| 0.55 |  |
|------|--|

|      |  |
|------|--|
| 0.14 |  |
|------|--|

|      |  |
|------|--|
| 0.18 |  |
|------|--|

|      |  |
|------|--|
| 2.78 |  |
|------|--|
