# Supplementary material
Source: publisher figshare collection journal article supplement (https://plos.figshare.com/articles/dataset/_/1627519)
Supplement: Supplementary file [file 1]

| PBS/BSA | TGF $\alpha$ 1 | TGF $\alpha$ 1 + DMSO | TGF $\alpha$ 1 + TRAM-34 | TGF $\alpha$ 1 + ICA-17043 | TGF $\alpha$ 1 + TRAM-7 |
|---------|----------------|-----------------------|--------------------------|----------------------------|-------------------------|
| 28.8    | 33.8           | 31.8                  | 28.19                    | 27.62                      | 31.31                   |
| 20.7    | 34.8           | 31                    | 23                       | 23.56                      | 25.19                   |
| 21.9    | 32.5           | 26.4                  | 21.94                    | 21.61                      | 27.08                   |
| 34.7    | 74.3           | 61.3                  | 44.93                    | 50.99                      | 61.57                   |
| 17.9    | 23.6           | 40                    | 30.14                    | 21.98                      | 30.65                   |
