# Supplementary material
Source: publisher figshare collection journal article supplement (https://plos.figshare.com/articles/dataset/_/1627519)
Supplement: Supplementary file [file 1]

| Command potential (mV) | Baseline |       | 1-EBIO  |        | TRAM-34 |       |
|------------------------|----------|-------|---------|--------|---------|-------|
| -120                   | -100.06  | 29.38 | -196.13 | 48.94  | -106.4  | 15.69 |
| -110                   | -81.58   | 23.48 | -155.35 | 35.53  | -90.05  | 13.36 |
| -100                   | -63.88   | 18.12 | -126.51 | 28.92  | -79.61  | 11.06 |
| -90                    | -50.72   | 10.64 | -93.04  | 25     | -64.17  | 8.2   |
| -80                    | -36.76   | 6.78  | -56.62  | 22.01  | -55.91  | 6.5   |
| -70                    | -29.3    | 6.26  | -22.83  | 26.44  | -45.47  | 4.79  |
| -60                    | -22.42   | 5.07  | 15.3    | 32.88  | -34.77  | 3.16  |
| -50                    | -14.89   | 5.72  | 50.52   | 41.56  | -27.53  | 3.4   |
| -40                    | -6.71    | 4.82  | 88.85   | 52.82  | -20.83  | 5.74  |
| -30                    | -1.49    | 4.92  | 119.47  | 63.45  | -6.61   | 4.62  |
| -20                    | 7.67     | 6.63  | 152.79  | 72.78  | 2.46    | 4.75  |
| -10                    | 13.14    | 8.09  | 187.26  | 81.89  | 13.18   | 5.51  |
| 0                      | 22.93    | 11.38 | 213.79  | 97.68  | 28.32   | 4.58  |
| 10                     | 32.76    | 12.91 | 248.49  | 101.25 | 43.01   | 2.78  |
| 20                     | 47.34    | 18.52 | 277.28  | 108.95 | 54.48   | 1.64  |
| 30                     | 64.45    | 26.14 | 331.26  | 121.05 | 77.15   | 16.06 |
| 40                     | 92.69    | 38.36 | 353.9   | 125.85 | 95.38   | 19.08 |
| 50                     | 143.07   | 62.85 | 406.29  | 130.41 | 115.6   | 27.1  |
| 60                     | 187.13   | 94.02 | 416.02  | 152.65 | 130     | 28.66 |
| 70                     | 217.43   | 98.06 | 462.79  | 159.5  | 136.45  | 26.94 |
| 80                     | 217.65   | 79.14 | 500.35  | 175    | 151.71  | 28.23 |
| 90                     | 191.85   | 53.48 | 515.34  | 181.76 | 157.71  | 19.9  |
| 100                    | 186.63   | 46.99 | 544.96  | 211.26 | 166.08  | 14.76 |
