# Supplementary material
Source: publisher figshare collection journal article supplement (https://plos.figshare.com/articles/dataset/_/1627519)
Supplement: Supplementary file [file 1]

| Unstimulated | TGF- $\alpha$ 1 | TGF- $\alpha$ 1 + DMSO | TGF- $\alpha$ 1 + TRAM-34 | TGF- $\alpha$ 1 + ICA-17043 | TGF- $\alpha$ 1 + TRAM-7 |
|--------------|-----------------|------------------------|---------------------------|-----------------------------|--------------------------|
| 7.1          | 1.2             | 1.1                    | 6                         | 5.3                         | 2.8                      |
| 5.1          | 1.9             | 1.9                    | 2.7                       | 4.4                         | 1.4                      |
| 4.9          | 1.8             | 1.6                    | 4                         | 4.4                         | 2.5                      |
| 4.7          | 2.1             | 2.2                    | 3.1                       | 5.6                         | 3.2                      |
| 5.8          | 1.3             | 0.4                    | 3                         | 4.1                         | 1                        |
| 4.2          | 0.8             | 1.1                    | 3.2                       | 1.9                         | 0.6                      |
