# Supplementary material
Source: publisher figshare collection journal article supplement (https://plos.figshare.com/articles/dataset/_/1627519)
Supplement: Supplementary file [file 1]

| PBS/BSA | TGF-beta | TGF-beta + DMSO | TGF-beta + TRAM34 | TGF-beta + ICA | TGF-beta + TRAM-7 |
|---------|----------|-----------------|-------------------|----------------|-------------------|
| 2.05    | 3.59     | 4.69            | 2.65              | 2.65           | 3.36              |
| 2.07    | 3.72     | 3.6             | 2.18              | 2.47           | 3.29              |
| 1.86    | 3.38     | 3.95            | 2.17              | 2.43           | 2.91              |
| 2.1     | 2.79     | 3.94            | 2.43              |                |                   |
| 1.97    | 2.97     | 3.91            | 2.74              |                |                   |
| 1.64    | 2.83     | 3.11            | 2.07              |                |                   |
