# Supplementary material
Source: publisher figshare collection journal article supplement (https://plos.figshare.com/articles/dataset/_/1627519)
Supplement: Supplementary file [file 1]

| PBS/BSA | 10ng/ml rh-AR | 100ng/ml rh-AR |
|---------|---------------|----------------|
| 0.778   | 0.971         | 1.403          |
| 0.569   | 0.586         | 0.738          |
| 0.621   | 0.628         | 0.939          |
