# Supplementary material
Source: publisher figshare collection journal article supplement (https://plos.figshare.com/articles/dataset/_/1627519)
Supplement: Supplementary file [file 1]

| Command potential (mV) | Asthmatics (n = 20) |       | Non-asthmatics (n = 14) |       |
|------------------------|---------------------|-------|-------------------------|-------|
| -120                   | -43.27              | 7.62  | -45.18                  | 7.56  |
| -110                   | -38.29              | 7.09  | -39.11                  | 6.58  |
| -100                   | -33.65              | 6.09  | -34.02                  | 5.54  |
| -90                    | -27.9               | 5.26  | -29.47                  | 5.14  |
| -80                    | -23.05              | 4.38  | -24.87                  | 4.99  |
| -70                    | -19.34              | 4.09  | -20.05                  | 4.65  |
| -60                    | -14.69              | 3.25  | -17.6                   | 4.29  |
| -50                    | -10.58              | 2.99  | -13.75                  | 3.77  |
| -40                    | -6.68               | 3.12  | -9.58                   | 3.41  |
| -30                    | -1.97               | 3.41  | -5.21                   | 3.17  |
| -20                    | 2.93                | 4.57  | -1.95                   | 2.94  |
| -10                    | 7.73                | 5.29  | 1.73                    | 2.51  |
| 0                      | 13.69               | 7.65  | 6.79                    | 2.82  |
| 10                     | 20.03               | 8.93  | 11.6                    | 2.85  |
| 20                     | 24.13               | 9.23  | 17.63                   | 3.53  |
| 30                     | 33.27               | 11.99 | 22.56                   | 4.14  |
| 40                     | 39.66               | 11.59 | 27.36                   | 5.41  |
| 50                     | 48.73               | 12.51 | 35.87                   | 7.1   |
| 60                     | 63.96               | 15.61 | 45.97                   | 9.14  |
| 70                     | 75.77               | 14.85 | 57.81                   | 11.35 |
| 80                     | 101.72              | 19.08 | 72.21                   | 14.82 |
| 90                     | 137.99              | 23.39 | 91.46                   | 18.07 |
| 100                    | 197.49              | 31.43 | 118.6                   | 22.96 |
