# Supplementary material
Source: publisher figshare collection journal article supplement (https://plos.figshare.com/articles/dataset/_/1627519)
Supplement: Supplementary file [file 1]

| Severe asthmatics | Moderate asthmatics | Mild asthmatics | Healthy controls |
|-------------------|---------------------|-----------------|------------------|
| 3.7               | 0.46                | 0.55            | 0.34             |
| 4.97              | 2.26                | 0.14            | 1.35             |
| 6.12              | 1.19                | 0.18            | 2.54             |
| 12.12             | 3.64                |                 | 0.43             |
| 2.66              | 0.68                |                 | 0.49             |
| 2.44              | 1.83                |                 | 0.06             |
| 3.39              | 2.78                |                 | 0.34             |
| 2.79              |                     |                 | 0.48             |
| 4.01              |                     |                 |                  |
| 1.6               |                     |                 |                  |
| 2.55              |                     |                 |                  |
| 0.46              |                     |                 |                  |
