# Supplementary material
Source: publisher figshare collection journal article supplement (https://plos.figshare.com/articles/dataset/_/1627519)
Supplement: Supplementary file [file 1]

| MUC5AC | KCa3.1 |
|--------|--------|
| 9.2    | 3.7    |
| 8.86   | 4.97   |
| 2.36   | 6.12   |
| 8.4    | 12.12  |
| 6.49   | 2.66   |
| 1.13   | 2.44   |
| 0.95   | 3.39   |
| 1.98   | 2.79   |
| 3.31   | 4.01   |
| 4.82   | 1.6    |
| 5.35   | 2.55   |
| 0.38   | 0.46   |
| 7.18   | 0.55   |
| 0.62   | 0.14   |
| 4.71   | 0.18   |
| 0.71   | 0.46   |
| 2.43   | 2.26   |
| 2.04   | 1.19   |
| 3.69   | 3.64   |
| 0.5    | 0.68   |
| 0.5    | 1.83   |
| 0.94   | 0.34   |
| 1      | 1.35   |
| 5.42   | 2.54   |
| 2.19   | 0.43   |
| 0.14   | 0.49   |
| 0.04   | 0.06   |
| 0.67   | 0.34   |
| 0.17   | 0.48   |
| 1.22   | 2.78   |
