# Supplementary material
Source: publisher figshare collection journal article supplement (https://plos.figshare.com/articles/dataset/_/1627519)
Supplement: Supplementary file [file 1]

| Unstimulated | 10ng/ml rh-AR | 100ng/ml rh-AR |
|--------------|---------------|----------------|
| 1.326        | 1.386         | 1.917          |
| 1.164        | 1.322         | 1.782          |
| 1.269        | 1.394         | 1.85           |
| 1.083        | 1.514         | 1.841          |
