# Supplementary material
Source: publisher figshare collection journal article supplement (https://plos.figshare.com/articles/dataset/_/1627519)
Supplement: Supplementary file [file 1]

| Command potential (mV) | Baseline |       | 1-EBIO  |        | TRAM-34 |       |
|------------------------|----------|-------|---------|--------|---------|-------|
| -120                   | -68.85   | 9.74  | -106.28 | 15.57  | -116.61 | 59.88 |
| -110                   | -54.27   | 9.23  | -81.13  | 11.52  | -107.63 | 56.23 |
| -100                   | -43.13   | 6.29  | -57.22  | 8.71   | -93.36  | 50.81 |
| -90                    | -33.47   | 4.68  | -32.3   | 5.87   | -79.68  | 42.69 |
| -80                    | -27.09   | 3.38  | -2.29   | 4.97   | -72.18  | 40.13 |
| -70                    | -21.21   | 3.78  | 32.14   | 9.02   | -61.37  | 35.07 |
| -60                    | -14.52   | 3.74  | 66.14   | 14.14  | -49.26  | 28.33 |
| -50                    | -11.52   | 2.24  | 103.1   | 20.06  | -42.63  | 25.36 |
| -40                    | -6.95    | 2.2   | 144.47  | 27.04  | -31.49  | 19.5  |
| -30                    | -3.77    | 2.49  | 188.47  | 33.74  | -18.03  | 15.03 |
| -20                    | 1.8      | 1.59  | 232.39  | 41.86  | -7.91   | 8.49  |
| -10                    | 7.5      | 2.41  | 279.74  | 49.59  | 1.9     | 3.94  |
| 0                      | 10.73    | 4.52  | 332.28  | 59.18  | 13.68   | 3.2   |
| 10                     | 17.93    | 3.46  | 380.09  | 67.71  | 25.63   | 7.64  |
| 20                     | 20.8     | 5.51  | 435.79  | 78.63  | 36.06   | 13.12 |
| 30                     | 27.56    | 5.77  | 482.79  | 87.31  | 47.43   | 16.96 |
| 40                     | 29.8     | 7.74  | 526.81  | 95.73  | 56.4    | 20.12 |
| 50                     | 35.83    | 7.67  | 566.3   | 108.28 | 68.69   | 24.04 |
| 60                     | 39.52    | 8.07  | 599.13  | 116.27 | 81.86   | 27.35 |
| 70                     | 50.28    | 10.05 | 631.81  | 127.65 | 93.33   | 32.48 |
| 80                     | 57.22    | 13.57 | 660.93  | 135.04 | 109.94  | 36.25 |
| 90                     | 72.5     | 17.41 | 687.02  | 140.32 | 127.13  | 43.24 |
| 100                    | 83.01    | 20.27 | 694.3   | 142.71 | 138.73  | 51.35 |
