# Supplementary material
Source: publisher figshare collection journal article supplement (https://plos.figshare.com/articles/dataset/_/1627519)
Supplement: Supplementary file [file 1]

| Command potential (mV) | Asthma  |       | Healthy |       |
|------------------------|---------|-------|---------|-------|
| -120                   | -102.72 | 25.88 | -19.9   | 5.76  |
| -110                   | -93.97  | 22.68 | -20.68  | 5.92  |
| -100                   | -80.65  | 20    | -15.81  | 3.99  |
| -90                    | -65.34  | 16.33 | -10.61  | 3.88  |
| -80                    | -49.61  | 13.77 | -5.57   | 4.09  |
| -70                    | -33.46  | 12.5  | 0.55    | 4.38  |
| -60                    | -15.28  | 12.99 | 9.91    | 5.18  |
| -50                    | 9.4     | 14.01 | 18.35   | 6.03  |
| -40                    | 35.1    | 16.4  | 26.11   | 7.77  |
| -30                    | 61.07   | 19.87 | 36.78   | 9.29  |
| -20                    | 91.35   | 23.83 | 45.42   | 11.52 |
| -10                    | 126.1   | 28.53 | 56.06   | 12.79 |
| 0                      | 159.9   | 32.73 | 63.5    | 14.46 |
| 10                     | 195.44  | 38.03 | 69.51   | 16.6  |
| 20                     | 233.84  | 44.44 | 69      | 17.09 |
| 30                     | 276.76  | 55.22 | 72.03   | 17.75 |
| 40                     | 317.29  | 62.81 | 70.08   | 17.1  |
| 50                     | 343.8   | 68.06 | 71.06   | 17.53 |
| 60                     | 363.6   | 67.39 | 72.21   | 16.74 |
| 70                     | 395.53  | 73.05 | 74.23   | 17.36 |
| 80                     | 420.91  | 76.44 | 87.97   | 20.79 |
| 90                     | 438.25  | 82.03 | 107.18  | 28.18 |
| 100                    | 451.67  | 89.88 | 140.53  | 35.36 |
