# Supplementary material
Source: publisher figshare collection journal article supplement (https://plos.figshare.com/articles/dataset/_/1627519)
Supplement: Supplementary file [file 1]

| PBS/BSA 6h | 10ng/ml rh-AR 6h | 100ng/ml rh-AR 6h |
|------------|------------------|-------------------|
| 1          | 33.59            | 21.11             |
| 1          | 4.25             | 10.58             |
| 1          | 3.23             | 3.69              |

| PBS/BSA 24h | 10ng/ml rh-AR 24h |
|-------------|-------------------|
| 1           | 12.27             |
| 1           | 57.15             |
| 1           | 82.71             |
| 1           | 31.05             |
| 1           | 5.62              |
| 1           | 6.19              |
| 1           | 5.8               |
| 1           | 52.59             |
| 1           | 33.13             |

| PBS/BSA 24h | 100ng/ml rh-AR 24h |
|-------------|--------------------|
| 1           | 64.74              |
| 1           | 118.6              |
| 1           | 93.7               |
