# Supplementary material
Source: publisher figshare collection journal article supplement (https://plos.figshare.com/articles/dataset/_/1627519)
Supplement: Supplementary file [file 1]

| DMSO  | rh-AR + DMSO | rh-AR + TRAM34 |
|-------|--------------|----------------|
| 1.062 | 1.497        | 1.5            |
| 0.965 | 1.402        | 1.446          |
| 0.942 | 1.189        | 1.017          |
