# Supplementary material
Source: publisher figshare collection journal article supplement (https://plos.figshare.com/articles/dataset/_/1627519)
Supplement: Supplementary file [file 1]

| Command potential (mV) | Baseline |       | 1-EBIO  |        | TRAM-34 |       |
|------------------------|----------|-------|---------|--------|---------|-------|
| -120                   | -121.11  | 67.15 | -376    | 188.12 | -118.23 | 51.06 |
| -110                   | -109.33  | 60.55 | -319.5  | 158.11 | -105.65 | 44.08 |
| -100                   | -90.92   | 49.99 | -282.74 | 142.08 | -99.53  | 43.59 |
| -90                    | -84.05   | 50.12 | -228.78 | 115.96 | -87.28  | 42.16 |
| -80                    | -76.68   | 49.39 | -161.99 | 78.59  | -73.89  | 38.26 |
| -70                    | -63.56   | 40.67 | -115.34 | 58.01  | -60.53  | 38.62 |
| -60                    | -54.93   | 33.46 | -67.28  | 37.18  | -48.03  | 35.37 |
| -50                    | -43.84   | 29.07 | -15.34  | 14.04  | -34.38  | 28.97 |
| -40                    | -30.56   | 18.72 | 31.6    | 6.95   | -18.17  | 28.13 |
| -30                    | -19.63   | 15.14 | 80.73   | 28.24  | -5.78   | 25.97 |
| -20                    | -14.02   | 13.06 | 131.21  | 49.77  | 12.67   | 26.05 |
| -10                    | -7.41    | 8.37  | 181.68  | 72.35  | 25.35   | 25.95 |
| 0                      | 2.32     | 1.92  | 233.74  | 94.55  | 41.91   | 26.56 |
| 10                     | 11.72    | 2.62  | 285.83  | 113.97 | 55.89   | 28.41 |
| 20                     | 21.93    | 5.87  | 334.43  | 139.03 | 68.3    | 31.48 |
| 30                     | 29.44    | 13.22 | 382.2   | 156.9  | 84.57   | 34.34 |
| 40                     | 40.36    | 16.16 | 426.45  | 181.8  | 96.21   | 41.66 |
| 50                     | 50.88    | 23.95 | 456.73  | 202.14 | 112.55  | 44.35 |
| 60                     | 61.01    | 28.22 | 482.2   | 219.11 | 129.98  | 51.15 |
| 70                     | 67.46    | 33.56 | 505.94  | 238.91 | 143.17  | 58.95 |
| 80                     | 81.36    | 40.38 | 520.83  | 261.85 | 153.52  | 64.2  |
| 90                     | 97.51    | 48.97 | 537.72  | 286.01 | 172.83  | 73.69 |
| 100                    | 113.81   | 58.66 | 554.85  | 303.16 | 195.78  | 82.85 |
