# Supplementary material
Source: publisher figshare collection journal article supplement (https://plos.figshare.com/articles/dataset/_/1627519)
Supplement: Supplementary file [file 1]

| Severe asthma | Moderate asthma | Mild asthma | Healthy |
|---------------|-----------------|-------------|---------|
| 40.4          | 40.5            | 39.5        | 49.2    |
| 54.8          | 46.2            | 56.2        | 50.2    |
| 42.8          | 43              | 31.2        | 49.2    |
| 54.6          | 53.5            |             | 35.8    |
| 61.3          | 38.6            |             | 23.3    |
| 50.5          | 33.3            |             | 46      |
| 44.5          | 56.3            |             | 42.1    |
| 28.3          |                 |             | 20      |
| 27.9          |                 |             |         |
| 50.8          |                 |             |         |
| 44.1          |                 |             |         |
| 62.5          |                 |             |         |
